# Supplementary material
Source: PubMed Central journal article supplement (PMC4596675)
Supplement: supp_115.177402_177402SI.pdf [file supp_115.177402_177402SI.pdf]

**A pre-synaptic regulatory system acts trans-synaptically via Mon1 to regulate glutamate receptor levels in *Drosophila*.**

Senthilkumar Deivasigamani <sup>\*,†</sup>, Anagha Basargekar <sup>†,‡</sup>, Kumari Shweta <sup>‡</sup>, Pooja Sonavane <sup>‡,§</sup>, Girish S. Ratnaparkhi <sup>\*,\*\*</sup>, Anuradha Ratnaparkhi <sup>‡,††</sup>

\*Indian Institute of Science Education and Research (IISER), Homi Bhabha Road, Pashan, Pune 411 008 & ‡Agharkar Research Institute, G.G. Agarkar Road, Pune 411 004

††Corresponding Author: Anuradha Ratnaparkhi, Agharkar Research Institute, G.G. Agarkar Road, Pune 411 004;  
[anu.aripune@gmail.com](mailto:anu.aripune@gmail.com)

Figure S1

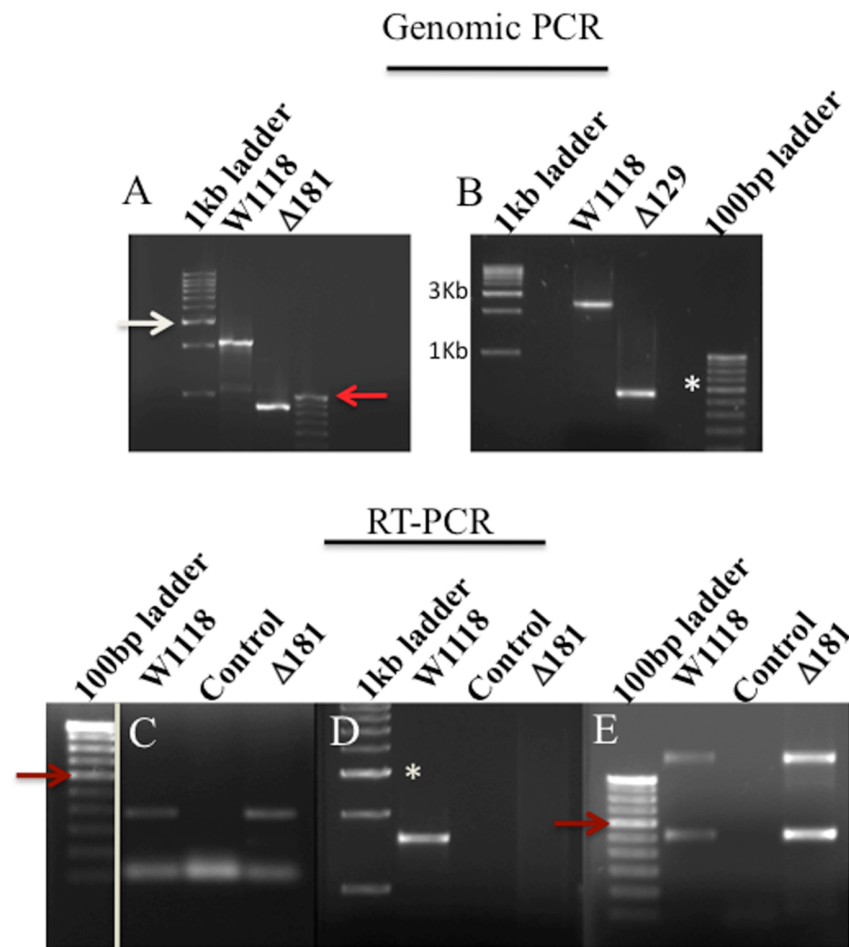

**Figure S1:** (A) Genomic PCR analysis of D181 mutants. Primers 2F and 31660\_Ex2R (Fig1, gray arrows), amplify a 2128 base pair product with wildtype DNA. A band of approximately 850bp is seen with D181 DNA indicating a deletion between these primer sites. White arrow points to the 3kb band; the red arrow indicates 1kb.

(B) Genomic PCR analysis of D129 mutant. PCR with primers 3F and Int2\_R2 (Fig1, red arrows) amplify a 2.4 kb region from wildtype DNA. In the D129 mutant, a smaller region of approximately 500bp is seen. The 600bp bright band (asterisk; 100bp ladder, Bangalore Genei, India) is spiked for easy identification.

(C-E) RT-PCR analysis of *Dmon1*<sup>Δ181</sup> mutants. (C) RT-PCR using primers 1F and 2R. The expected 340bp size band was amplified from cDNA derived from wildtype and *Dmon1*<sup>Δ181</sup> animals. The red arrow marks the 600bp band in the DNA ladder. The white line after the lane showing the DNA ladder and RT-PCR product denotes cropping of the lanes in the middle (D) PCR with primers 1F and 4R, amplified the full length *Dmon1* cDNA from wildtype but not *Dmon1*<sup>Δ181</sup> mutant indicating the absence of a full length transcript. The asterisk denotes a 3kb band. (E) PCR using primers designed to the 3' coding region of *CG31660/pog*. The two bands observed in each case correspond to different splice variants of *pog*. The red arrow marks the 600bp band. The middle lane in panels C,D and, and E is the no DNA RT-PCR control.

Figure S2

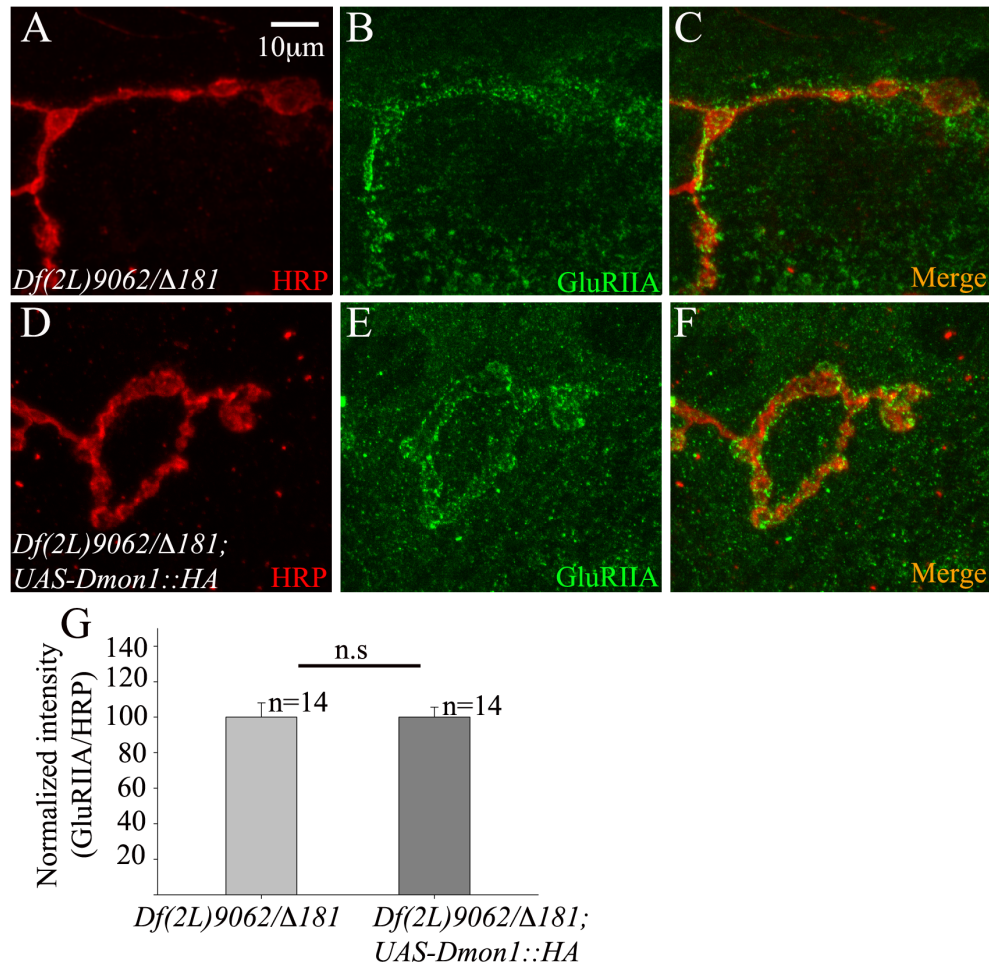

Figure S2. (A-C) *Dmon1* $\Delta$ 181/*Df(2L)9062* (D-F) *Dmon1* $\Delta$ 181/*Df(2L)9062*; *UAS-Dmon1::HA* stained with anti-HRP (red) and anti-GluRIIA (green). (G). Normalized intensity (GluRIIA:HRP). No significant difference in intensity was observed between the two genotypes.

Figure S3

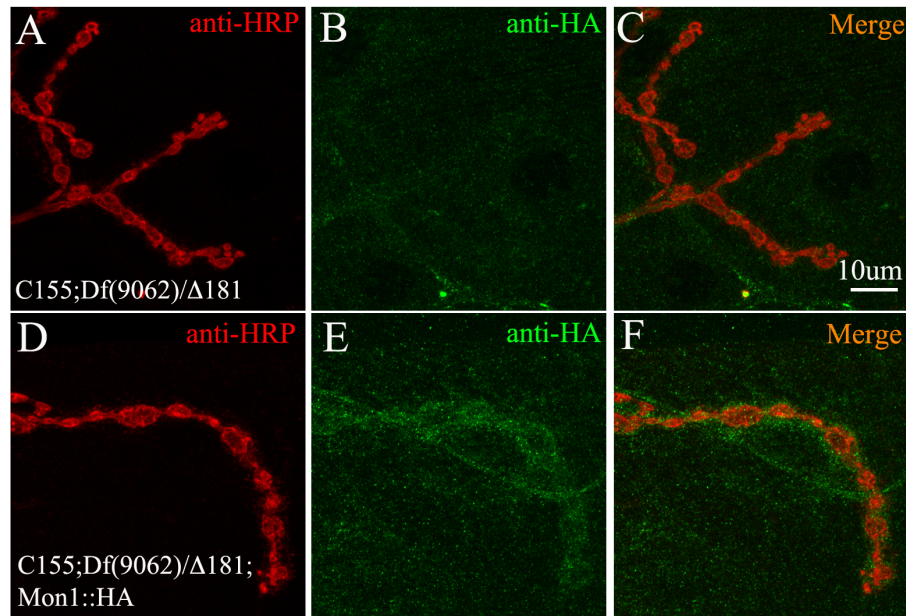

Figure S3. (A-C) Control (C155; Dmon1 $\Delta$ 181/Df(2L)9062) animals stained with anti-HRP (red) and anti-HA (green). (D-F) Expression of Dmon1::HA in a Dmon1 mutant background (C155; Dmon1 $\Delta$ 181/Df(2L)9062;UAS-Dmon1::HA). HA positive puncta are seen surrounding the bouton.
