# Supplementary material
Source: PubMed Central journal article supplement (PMC4596675)
Supplement: supp_115.177402_FigureS2.pdf [file supp_115.177402_FigureS2.pdf]

Figure S2

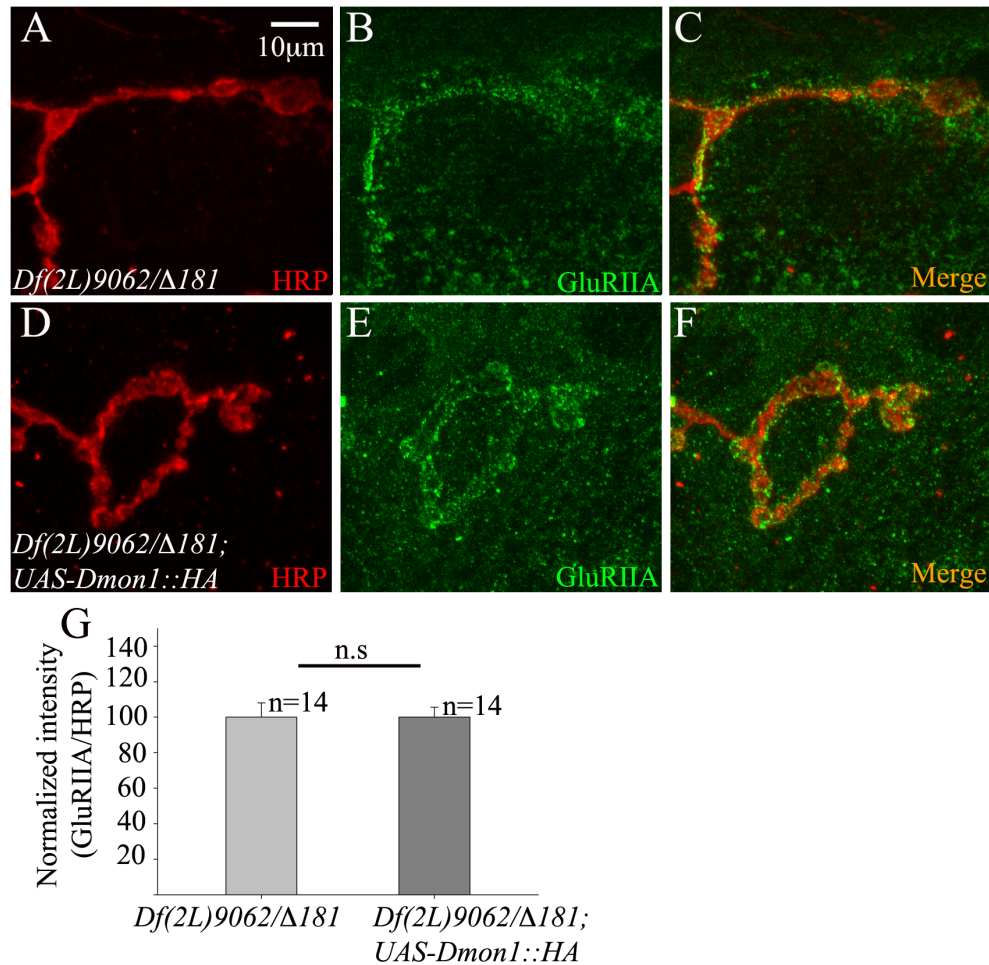

Figure S2. (A-C) *Dmon1* $\Delta$ 181/*Df(2L)9062* (D-F) *Dmon1* $\Delta$ 181/*Df(2L)9062*; *UAS-Dmon1::HA* stained with anti-HRP (red) and anti-GluRIIA (green). (G). Normalized intensity (GluRIIA:HRP). No significant difference in intensity was observed between the two genotypes.
