# Supplementary material
Source: PubMed Central journal article supplement (PMC4596675)
Supplement: supp_115.177402_FigureS3.pdf [file supp_115.177402_FigureS3.pdf]

Figure S3

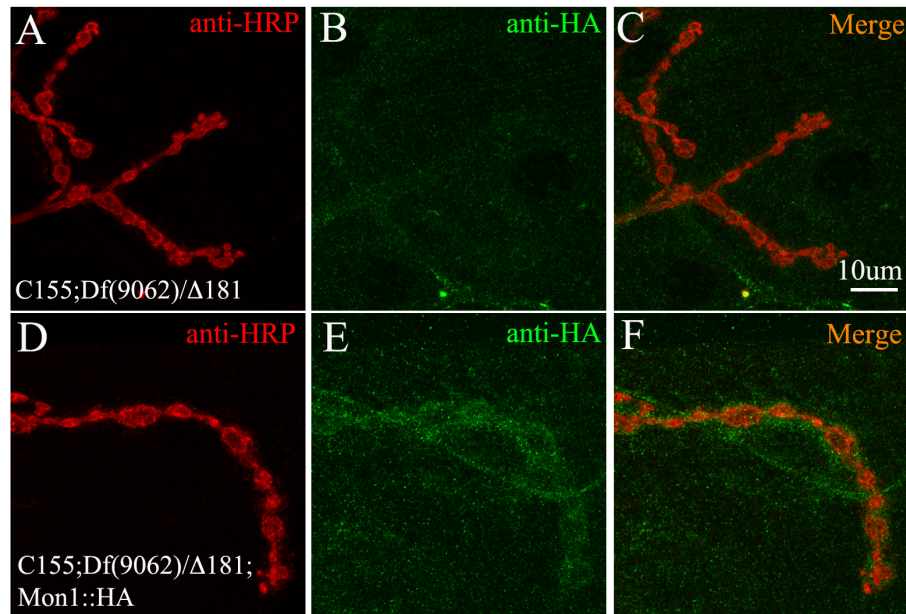

Figure S3. (A-C) Control (C155; Dmon1 $\Delta$ 181/Df(2L)9062) animals stained with anti-HRP (red) and anti-HA (green). (D-F) Expression of Dmon1::HA in a Dmon1 mutant background (C155; Dmon1 $\Delta$ 181/Df(2L)9062;UAS-Dmon1::HA). HA positive puncta are seen surrounding the bouton.
